# Supplementary material
Source: Springer Nature journal article supplement (https://www.springermedizin.de/resource/supplementary/12879_2011_2134_MOESM2_ESM.pdf/9443730)
Supplement: MOESM2 [file 9443730]

Schools for inclusion in the study were identified through an iterative process involving communication with DEECD, the Catholic Education Office and the Department of Health

**Schools / Principals  
contacted (n=82)**

**Eligible schools (n=39)**

25 Government (42%)  
10 Catholic (77%)  
4 Independent (44%)

**Ineligible schools (n=43)**

35 Government (58%)  
3 Catholic (23%)  
5 Independent (56%)

**Eligible schools that consented  
(n=33)  
85%**

Eligible schools that declined consent or  
were uncontactable  
(n=6)  
15%

**Eligible families identified by schools  
(n=1,188)**

No child in quarantine (n=23) or not at address (n=8)

**Responding households  
(n=314)**

At least one resident parent not employed (n=116) or a  
parent also placed in quarantine (n=40) or both (n=25)

**Final sample  
(n=133 households)**
